# Supplementary material for: The structured organization of Deinococcus radiodurans’ cell envelope
Source: PubMed Central journal article supplement — Proc Natl Acad Sci U S A. 2022 Nov 2;119(45):e2209111119. doi: 10.1073/pnas.2209111119 (PMC9659351; doi:10.1073/pnas.2209111119), 2022-11-02
Supplement: pnas.2209111119.sapp.pdf [file pnas.2209111119.sapp.pdf]

## Supporting Information for

The structured organization of *Deinococcus radiodurans*' cell envelope

Domenica Farci<sup>1,2,3,\*</sup>, Patrycja Haniewicz<sup>1</sup>, and Dario Piano<sup>1,3,\*</sup>

<sup>1</sup>*Department of Plant Physiology, Warsaw University of Life Sciences - SGGW, Warsaw, 02-776, Poland;*

<sup>2</sup>*Department of Chemistry, Umeå University, Linnaeus väg 6, 90736, Umeå, Sweden;*

<sup>3</sup>*Laboratory of Plant Physiology and Photobiology, Department of Life and Environmental Sciences, Università degli Studi di Cagliari, Viale S. Ignazio da Laconi 13, 09123 Cagliari, Italy.*

*\*Corresponding authors: Dr. D. Farci (domenica.farci@unica.it) and Prof. Dr. D. Piano (dario.piano@unica.it).*

### **This PDF file includes:**

Figures S1 to S2

Legends for Movies S1 to S2

Table S1

### **Other supporting materials for this manuscript include the following:**

Movies S1 to S2

**Supplementary Figure 1: Tomographic parameters and resolution data.** In the image is reported the Fourier Shell Correlation (FSC) for the symmetrized subtomogram averaging; the dashed-red line represents the spatial frequency with cutoff at 0.5 (Nyquist frequency - gold standard). The inset table reports the CTF parameters. Related to Figure 6.

**Figure S1**

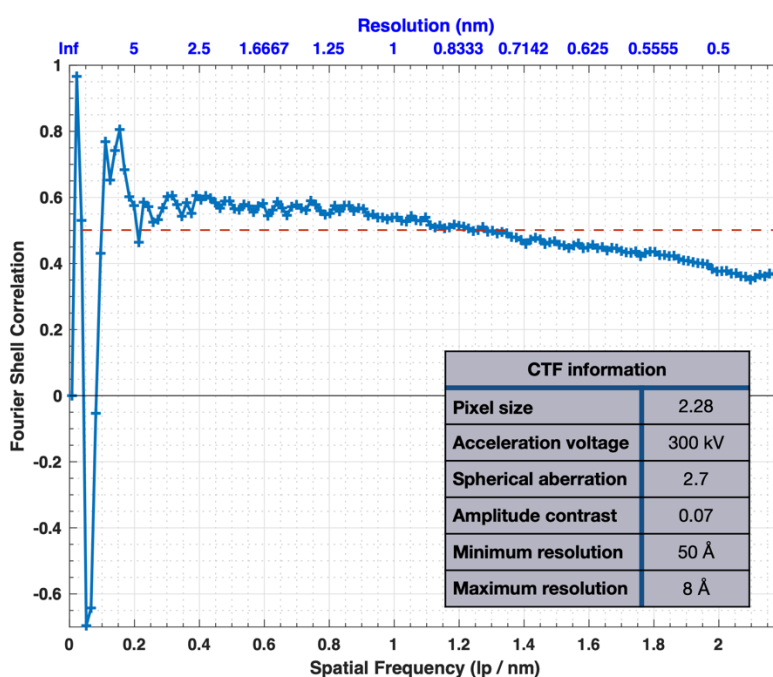

**Supplementary Figure 2: Cell envelope layering and membranes localization.** On the left is shown the tomographic reconstruction of a patch. The S-layer/outer membrane system (SL/OM) and the inner membranes (IM, black arrows) are highlighted with black arrows. The scale bar indicates 200 Å. On the right, it is shown a detail of the same cell envelope processed by subtomogram averaging with indicated cytosol, periplasm, and extracellular space. The scale bar indicates 50 Å. The inset table on the bottom summarizes the thickness values of the cell envelope and its regions. The values in the inset table represent the mean of 40 independent tomograms. Related to Figure 5.

**Figure S2**

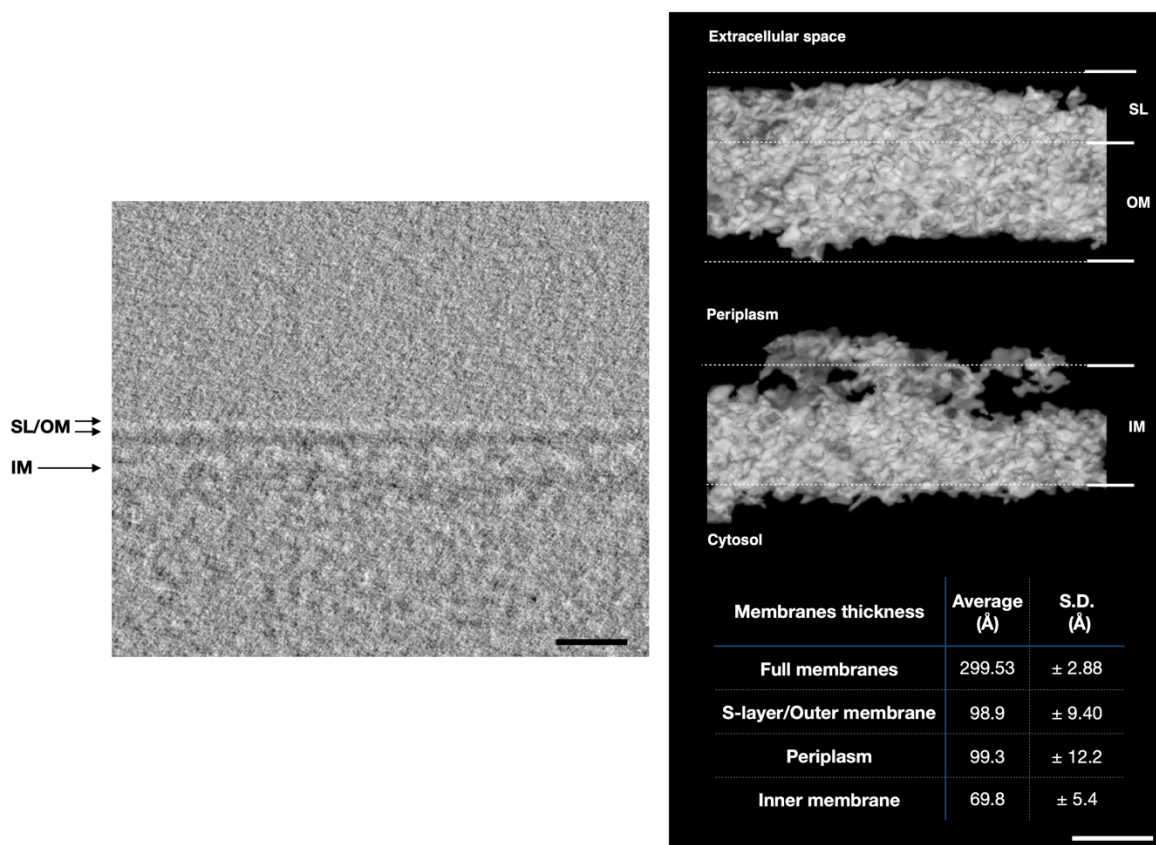

**Supplementary Movie 1:** Cryo-EM density map showing the features of the diffracting cell envelope fraction with a detail of its main complexes. The T4P-like (orange), the SDBC (pink), and the radial-dimeric complex (yellow) were extracted and refitted into the map. Related to Figure 3.

**Supplementary Movie 2:** Representative tomogram of a cell envelope patch reconstructed from a typical specimen. Related to Figure 5.

**Supplementary Table 1:** Key resources table for the Materials and Methods.

| REAGENT or RESOURCE                                                             | SOURCE                                                             | IDENTIFIER                                                                                                                                      |
|---------------------------------------------------------------------------------|--------------------------------------------------------------------|-------------------------------------------------------------------------------------------------------------------------------------------------|
| <b>Bacterial strain</b>                                                         |                                                                    |                                                                                                                                                 |
| <i>Deinococcus radiodurans R1</i>                                               | ATCC ( <a href="https://www.atcc.org/">https://www.atcc.org/</a> ) | ATCC 13939                                                                                                                                      |
| <b>Chemicals, peptides, and recombinant proteins</b>                            |                                                                    |                                                                                                                                                 |
| Tryptone                                                                        | Becton, Dickinson and Company                                      | Cat# 211705                                                                                                                                     |
| Yeast extract                                                                   | Becton, Dickinson and Company                                      | Cat# 212750                                                                                                                                     |
| Glucose                                                                         | Carlo Erba                                                         | CAS n° 50-99-7                                                                                                                                  |
| Sodium Phosphate dibasic dodecahydrate                                          | Carlo Erba                                                         | CAS n° 10039-32-4                                                                                                                               |
| Sodium Phosphate monobasic monohydrate                                          | Carlo Erba                                                         | CAS n° 10049-21-5                                                                                                                               |
| Dnase I                                                                         | Roche                                                              | Art n° 11284932001                                                                                                                              |
| Lysozyme                                                                        | Sigma Aldrich                                                      | CAS n° 12650-88-3                                                                                                                               |
| Bradford assay kit                                                              | ThermoFisher                                                       | Cat# 23246                                                                                                                                      |
| n-dodecyl- $\beta$ -D-maltoside                                                 | Glycon                                                             | Cat# D97002-C                                                                                                                                   |
| Sodium chloride                                                                 | Sigma Aldrich                                                      | CAS n° 7647-14-5                                                                                                                                |
| Potassium chloride                                                              | Carlo Erba                                                         | CAS n° 7447-40-7                                                                                                                                |
| HEPES                                                                           | Roth                                                               | CAS n° 7365-45-9                                                                                                                                |
| <b>Deposited data</b>                                                           |                                                                    |                                                                                                                                                 |
| Subtomogram averaging of <i>Deinococcus radiodurans</i> ' cell wall             | This study                                                         | EMD-14095                                                                                                                                       |
| Symmetrized subtomogram averaging of <i>Deinococcus radiodurans</i> ' cell wall | This study                                                         | EMD-14096                                                                                                                                       |
| 3D map of <i>Deinococcus radiodurans</i> cell wall by electron crystallography  | This study                                                         | EMD-14097                                                                                                                                       |
| <b>Software and algorithms</b>                                                  |                                                                    |                                                                                                                                                 |
| CTFFIND3                                                                        | Mindell <i>and</i> Grigorieff, 2003                                | <a href="https://grigoriefflab.umassmed.edu/ctf_estimation_ctffind_ctfilt">https://grigoriefflab.umassmed.edu/ctf_estimation_ctffind_ctfilt</a> |
| MotionCor2                                                                      | Zheng <i>et al.</i> , 2017                                         | <a href="https://emcore.ucsf.edu/ucsf-software">https://emcore.ucsf.edu/ucsf-software</a>                                                       |
| Focus package                                                                   | Biyani <i>et al.</i> , 2017                                        | <a href="https://lbem-focus.epfl.ch/about.php">https://lbem-focus.epfl.ch/about.php</a>                                                         |

|                                      |                                |                                                                                                                                   |
|--------------------------------------|--------------------------------|-----------------------------------------------------------------------------------------------------------------------------------|
| 2dx package                          | Gipson <i>et al.</i> , 2007    | <a href="https://www.c-cina.org/stahlberg/research/tools/soft/2dx/">https://www.c-cina.org/stahlberg/research/tools/soft/2dx/</a> |
| Chimera                              | Pettersen <i>et al.</i> , 2004 | <a href="https://www.cgl.ucsf.edu/chimera/">https://www.cgl.ucsf.edu/chimera/</a>                                                 |
| <i>etomo</i>                         | Mastronarde, 2005              | <a href="https://bio3d.colorado.edu/imod/">https://bio3d.colorado.edu/imod/</a>                                                   |
| PEET                                 | Heumann <i>et al.</i> , 2011   | <a href="https://bio3d.colorado.edu/PEET/">https://bio3d.colorado.edu/PEET/</a>                                                   |
| <b>Other</b>                         |                                |                                                                                                                                   |
| anion-exchange chromatography column | Hiload HP, Amersham            | n.a.                                                                                                                              |
| Quantifoil R2/1.3 holey carbon grids | Quantifoil                     | n.a.                                                                                                                              |
| autogrid                             | FEI, Eindhoven, Netherlands    | n.a.                                                                                                                              |
